# Supplementary material for: Etching synthesis of iron oxide nanoparticles for adsorption of arsenic from water
Source: Royal Society of Chemistry journal article supplement (doi:10.1039/c5ra26143k), 2016-01-01
Supplement: c5ra26143k1.pdf [file c5ra26143k1.pdf]

## **Supporting Information**

### **Etching synthesis of iron oxide nanoparticles for adsorption of arsenic from water**

Wei Cheng, Weidong Zhang, Lijuan Hu, Wei Ding, Feng Wu and Jinjun Li \*

School of Resources and Environmental Sciences, Hubei Key Lab of Bioresources and  
Environmental Biotechnologies, Wuhan University, Wuhan 430079, China

## Figure captions

**Fig. S1†** Energy-dispersive spectrometry pattern of (a) Fe-Si composite and (b) nano-iron oxide.

**Fig. S2†**. X-ray diffraction spectrum of nano-iron oxide.

**Fig. S3†** Nitrogen adsorption–desorption isotherm and BJH pore size distribution of nano-iron oxide.

**Fig. S4†** Point of zero charge (PZC) of nano-iron oxide.

**Fig. S5†** (a) As(III) and (b) As(V) speciation for various pH values (calculated using Visual MINTEQ3.1).

**Fig. S6†** Influence of initial H<sub>2</sub>O<sub>2</sub> concentration on As(III) removal.

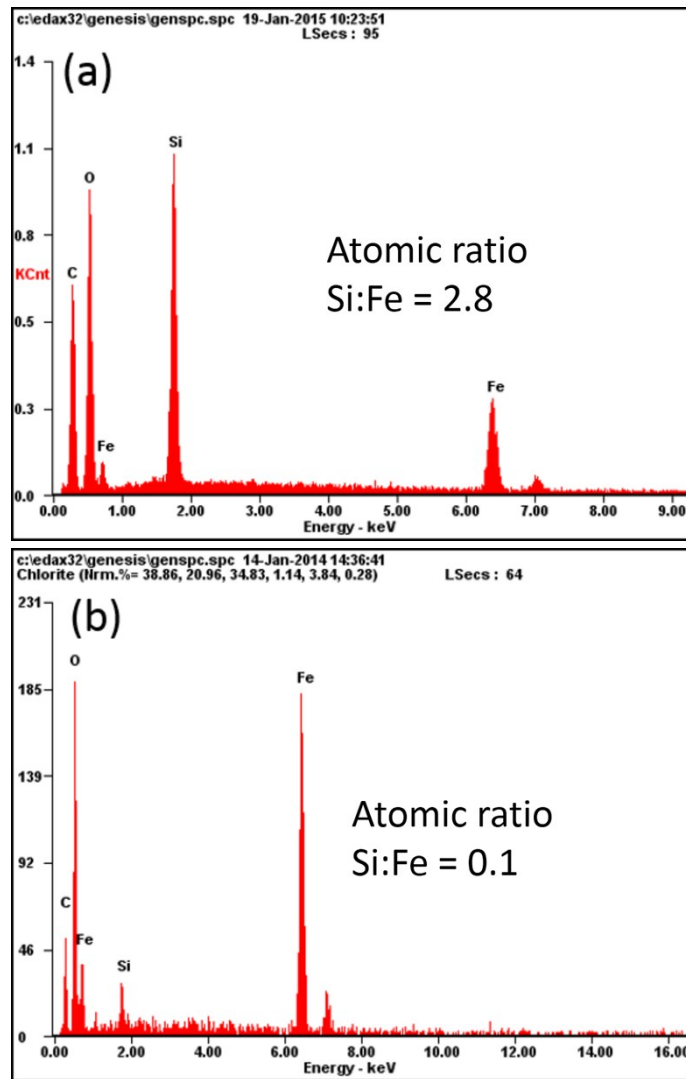

**Fig. S1†** Energy-dispersive spectrometry pattern of (a) Fe-Si composite and (b) nano-iron oxide.

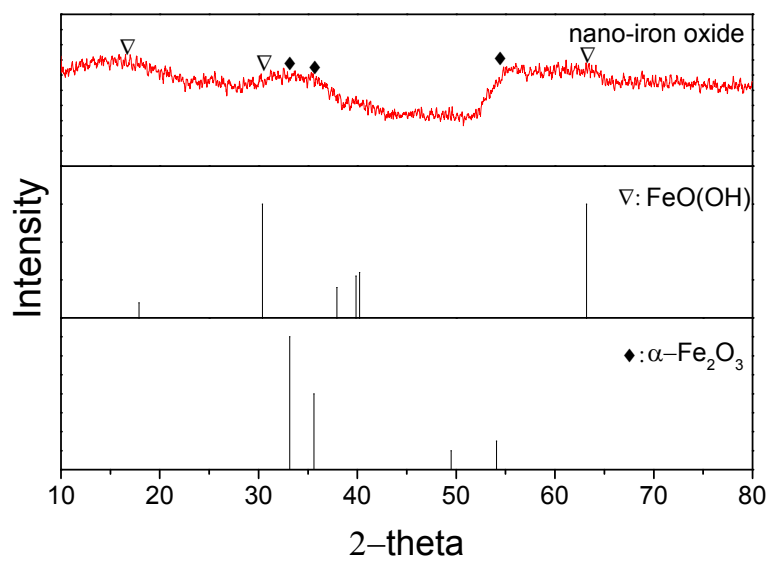

**Fig. S2†** X-ray diffraction spectrum of nano-iron oxide.

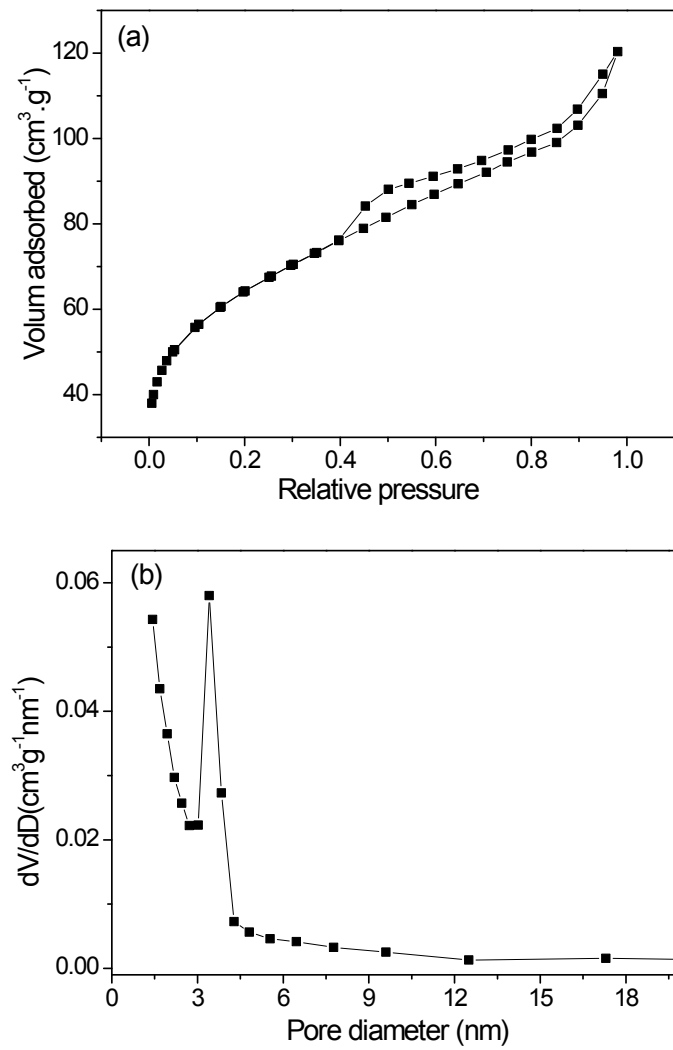

**Fig. S3†** Nitrogen adsorption–desorption isotherm and BJH pore size distribution of nano-iron oxide.

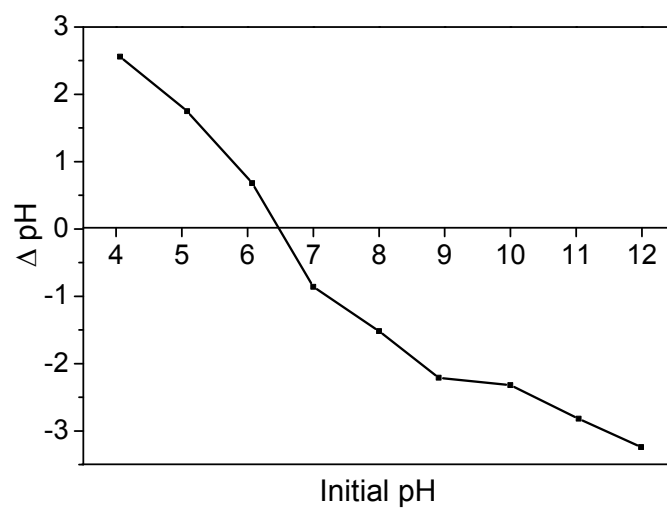

**Fig. S4†** Point of zero charge (PZC) of nano-iron oxide.

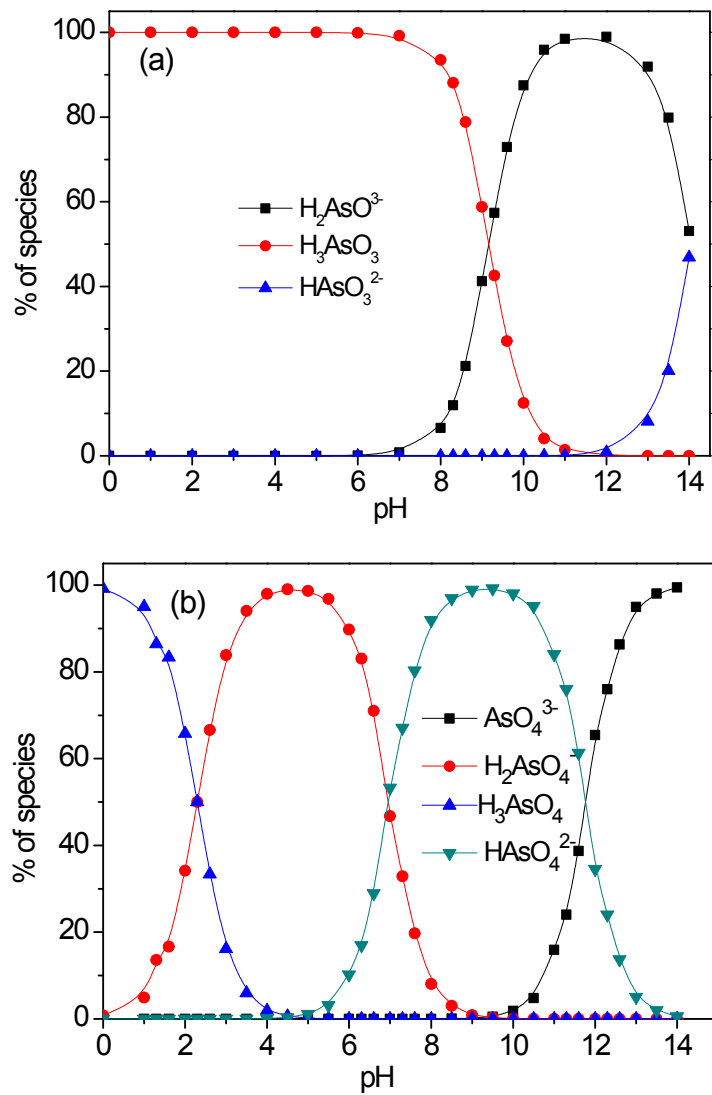

**Fig. S5†** (a) As(III) and (b) As(V) speciation for various pH values (calculated using Visual MINTEQ3.1).

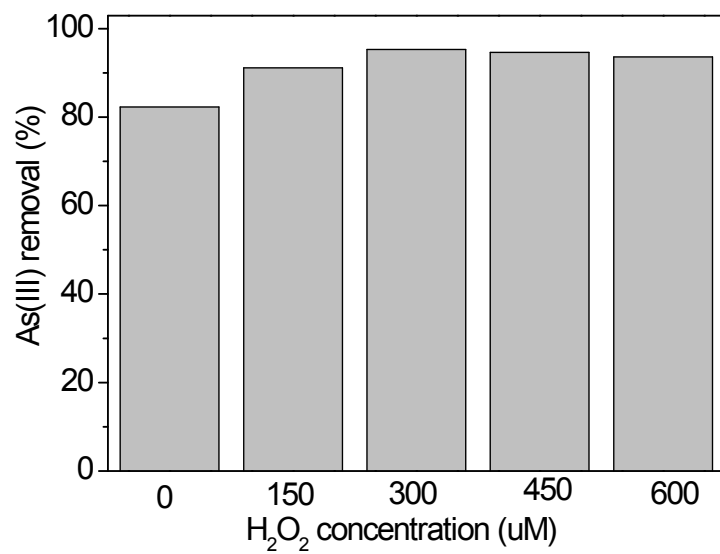

**Fig. S6†** Influence of initial H<sub>2</sub>O<sub>2</sub> concentration on As(III) removal at pH 7.
